# Supplementary material for: Ba5CdGa6Se15, a congruently-melting infrared nonlinear optical material with strong SHG response
Source: Royal Society of Chemistry journal article supplement (doi:10.1039/c6tc05111a), 2017-01-01
Supplement: c6tc05111a1.pdf [file c6tc05111a1.pdf]

## SUPPLEMENTARY INFORMATION

### **Ba<sub>5</sub>CdGa<sub>6</sub>Se<sub>15</sub>, a congruently-melting infrared nonlinear optical material with strong SHG response**

Wenlong Yin,<sup>a,b</sup> Abishek K. Iyer,<sup>b</sup> Chao Li,<sup>c</sup> Jiyong Yao<sup>c</sup> and Arthur Mar<sup>\*b</sup>

<sup>a</sup> *Institute of Chemical Materials, China Academy of Engineering Physics, Mianyang 621900, People's Republic of China*

<sup>b</sup> *Department of Chemistry, University of Alberta, Edmonton, Alberta, Canada T6G 2G2*

<sup>c</sup> *Center for Crystal Research and Development, Technical Institute of Physics and Chemistry, Chinese Academy of Sciences, Beijing 100190, People's Republic of China*

**Table S1.** Atomic coordinates and equivalent isotropic displacement parameters ( $\text{\AA}^2$ ) for Ba<sub>5</sub>CdGa<sub>6</sub>Se<sub>15</sub>.

**Table S2.** Interatomic distances ( $\text{\AA}$ ) for Ba<sub>5</sub>CdGa<sub>6</sub>Se<sub>15</sub>.

**Figure S1.** Powder XRD pattern of Ba<sub>5</sub>CdGa<sub>6</sub>Se<sub>15</sub>. The inset shows an SEM image of a typical crystal of this compound.

---

\* *Department of Chemistry, University of Alberta, Edmonton, Alberta, Canada T6G 2G2. E-mail: arthur.mar@ualberta.ca; Fax: +1-780-492-8231*

**Table S1** Atomic coordinates and equivalent isotropic displacement parameters ( $\text{\AA}^2$ ) for  $\text{Ba}_5\text{CdGa}_6\text{Se}_{15}$

| Atom | Wyckoff position | Occupancy                     | $x$        | $y$        | $z$         | $U_{\text{eq}}$ ( $\text{\AA}^2$ ) <sup>a</sup> |
|------|------------------|-------------------------------|------------|------------|-------------|-------------------------------------------------|
| Ba1  | 8c               | 1                             | 0.11158(2) | 0.16313(3) | 0.53149(8)  | 0.02311(13)                                     |
| Ba2  | 8c               | 1                             | 0.61573(2) | 0.13084(3) | 0.49176(8)  | 0.01937(11)                                     |
| Ba3  | 4b               | 1                             | ¼          | 0.15388(4) | 0.08079(11) | 0.01982(15)                                     |
| M1   | 8c               | 1 Ga                          | 0.02912(4) | 0.19363(5) | 0.06038(14) | 0.01622(19)                                     |
| M2   | 8c               | 0.408(9) Cd,<br>0.592(9) Ga   | 0.15858(4) | 0.47028(4) | 0.47523(14) | 0.0230(3)                                       |
| M3   | 4b               | 1 Ga                          | ¼          | 0.30720(7) | 0.6096(2)   | 0.0174(3)                                       |
| M4   | 4b               | 0.195(12) Cd,<br>0.805(12) Ga | ¼          | 0.47167(7) | 0.95279(19) | 0.0181(4)                                       |
| M5   | 4a               | 1 Ga                          | 0          | 0          | 0.0000(2)   | 0.0172(3)                                       |
| Se1  | 8c               | 1                             | 0.00009(4) | 0.09428(4) | 0.24606(15) | 0.01900(18)                                     |
| Se2  | 8c               | 1                             | 0.01066(4) | 0.30348(5) | 0.22983(15) | 0.02121(19)                                     |
| Se3  | 8c               | 1                             | 0.07855(5) | 0.50724(5) | 0.27451(16) | 0.0296(2)                                       |
| Se4  | 8c               | 1                             | 0.12625(3) | 0.19928(4) | 0.01776(14) | 0.01841(18)                                     |
| Se5  | 8c               | 1                             | 0.15950(4) | 0.34053(5) | 0.48910(15) | 0.02062(18)                                     |
| Se6  | 8c               | 1                             | 0.16694(4) | 0.02270(5) | 0.31479(15) | 0.0231(2)                                       |
| Se7  | 4b               | 1                             | ¼          | 0.18387(6) | 0.57922(19) | 0.0178(2)                                       |
| Se8  | 4b               | 1                             | ¼          | 0.50882(7) | 0.3097(2)   | 0.0257(3)                                       |
| Se9  | 4b               | 1                             | ¼          | 0.84371(7) | 0.46676(19) | 0.0184(2)                                       |

<sup>a</sup>  $U_{\text{eq}}$  is defined as one-third of the trace of the orthogonalized  $U_{ij}$  tensor.

**Table S2** Interatomic distances (Å) for Ba<sub>5</sub>CdGa<sub>6</sub>Se<sub>15</sub>

|              |            |                 |            |
|--------------|------------|-----------------|------------|
| Ba1–Se2      | 3.3042(12) | Ba3–Se7         | 3.3701(15) |
| Ba1–Se4      | 3.3123(11) | Ba3–Se6 (×2)    | 3.5737(12) |
| Ba1–Se6      | 3.3314(11) | Ba3–Se9         | 3.7143(15) |
| Ba1–Se7      | 3.3942(6)  | Ga1–Se1         | 2.3728(13) |
| Ba1–Se3      | 3.4856(11) | Ga1–Se4         | 2.3742(13) |
| Ba1–Se4      | 3.4893(11) | Ga1–Se2         | 2.3923(13) |
| Ba1–Se1      | 3.5523(11) | Ga1–Se2         | 2.4265(13) |
| Ba1–Se5      | 3.6027(11) | Cd/Ga2–Se3      | 2.4561(15) |
| Ba2–Se2      | 3.2492(11) | Cd/Ga2–Se6      | 2.4706(14) |
| Ba2–Se4      | 3.2691(10) | Cd/Ga2–Se5      | 2.4876(12) |
| Ba2–Se9      | 3.2959(5)  | Cd/Ga2–Se8      | 2.5805(11) |
| Ba2–Se1      | 3.3200(11) | Ga3–Se7         | 2.3713(18) |
| Ba2–Se3      | 3.3638(11) | Ga3–Se5 (×2)    | 2.4205(11) |
| Ba2–Se6      | 3.4011(11) | Ga3–Se9         | 2.4660(19) |
| Ba2–Se5      | 3.5028(11) | Cd/Ga4–Se6 (×2) | 2.4177(12) |
| Ba2–Se5      | 3.5359(11) | Cd/Ga4–Se9      | 2.4532(18) |
| Ba3–Se4 (×2) | 3.1517(9)  | Cd/Ga4–Se8      | 2.4679(19) |
| Ba3–Se8      | 3.3083(16) | Ga5–Se3 (×2)    | 2.4239(13) |
| Ba3–Se7      | 3.3496(15) | Ga5–Se1 (×2)    | 2.4323(13) |

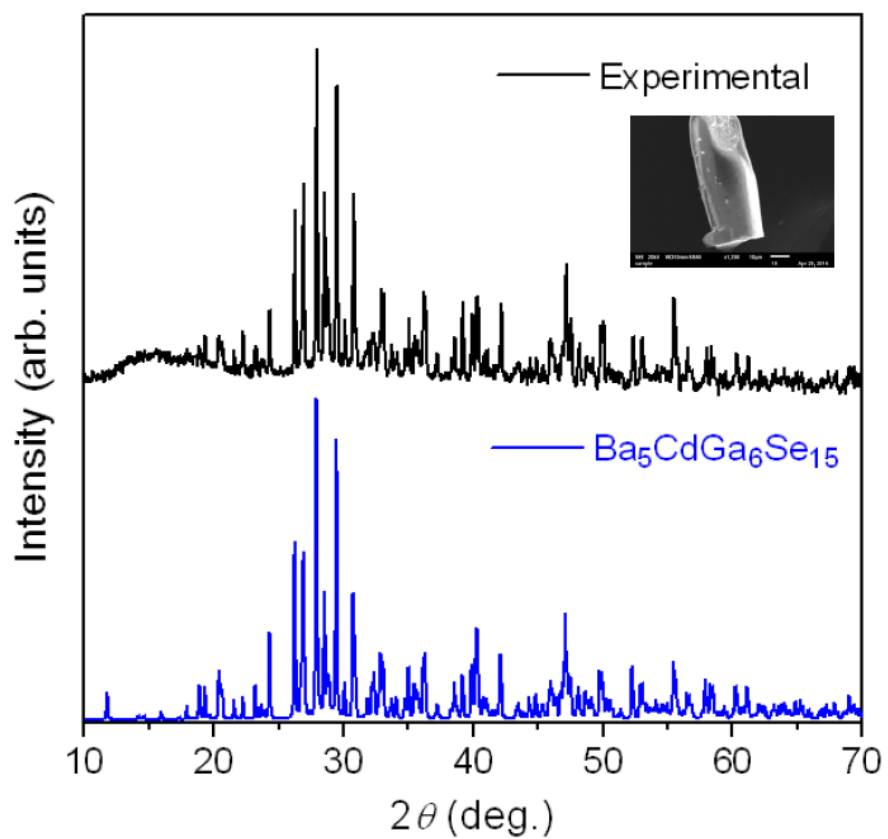

**Figure S1.** Powder XRD pattern of  $\text{Ba}_5\text{CdGa}_6\text{Se}_{15}$ . The inset shows an SEM image of a typical crystal of this compound.
